# Supplementary material for: Genome-wide identification and expression analysis of WRKY family genes under soft rot in Chinese cabbage
Source: Front Genet. 2022 Sep 26;13:958769. doi: 10.3389/fgene.2022.958769 (PMC9548547; doi:10.3389/fgene.2022.958769)
Supplement: Supplementary file 2 [file Table1.XLSX]

## Sheet: Sheet1
Gene	Gene ID（3.0）	Start	End	Strand	染色体位置Chromosome	Group	cds	mw	pl
BrWRKY1	BraA01g000440.3C	205578	206412	-	A01	IIc	169	19395.7	9.36
BrWRKY2	BraA01g006130.3C	2966565	2967891	-	A01	IIa	317	35705.7	8.23
BrWRKY3	BraA01g006320.3C	3053567	3054947	+	A01	IId	323	35382.1	9.83
BrWRKY4	BraA01g009700.3C	4912280	4913423	+	A01	IIc	300	33402.7	7.09
BrWRKY5	BraA01g012730.3C	6650817	6653835	-	A01	IIb	538	58629	5.51
BrWRKY6	BraA01g014230.3C	7536155	7537482	+	A01	IIe	296	32947.7	7.56
BrWRKY7	BraA01g014490.3C	7721909	7723035	-	A01	III	316	35269.5	5.83
BrWRKY8	BraA01g015000.3C	7967089	7968473	+	A01	IId	333	36523.2	9.82
BrWRKY9	BraA01g017130.3C	9112493	9114333	-	A01	I	534	58828.2	6.17
BrWRKY10	BraA01g017390.3C	9248564	9251345	-	A01	I	535	59122.9	7.08
BrWRKY11	BraA01g044960.3C	29586216	29588432	+	A01	IIb	535	57900.1	8.74
BrWRKY12	BraA02g000030.3C	14953	15998	+	A02	III	290	33517.5	7.75
BrWRKY13	BraA02g002250.3C	1120113	1121628	+	A02	I	320	36101.5	9.38
BrWRKY14	BraA02g005870.3C	2772433	2774611	+	A02	IIb	516	55318.3	7.18
BrWRKY15	BraA02g009830.3C	4679264	4680417	-	A02	III	284	32620.9	6.05
BrWRKY16	BraA02g009840.3C	4684961	4686180	-	A02	III	260	29937.9	6.15
BrWRKY17	BraA02g015080.3C	7866423	7867652	-	A02	IIe	344	38230.2	5.51
BrWRKY18	BraA02g018110.3C	10063484	10064978	+	A02	IIb	357	41118.1	5.69
BrWRKY19	BraA02g019120.3C	10840403	10842253	-	A02	IIc	299	33023.1	6.23
BrWRKY20	BraA02g019440.3C	11134033	11136151	-	A02	IIb	383	42989.9	7.3
BrWRKY21	BraA02g025510.3C	15325371	15327458	-	A02	IIa	290	32426.4	7.55
BrWRKY22	BraA02g025730.3C	15448606	15449556	+	A02	III	198	22859.3	4.87
BrWRKY23	BraA02g025750.3C	15457998	15458970	+	A02	III	248	28059.4	4.85
BrWRKY24	BraA02g025770.3C	15475638	15476567	+	A02	III	258	29406	5.67
BrWRKY25	BraA02g028540.3C	17828776	17829988	-	A02	III	331	36796	5.78
BrWRKY26	BraA02g030090.3C	20202365	20202906	-	A02	I	137	15439	5.49
BrWRKY27	BraA02g032790.3C	22644999	22646380	-	A02	IIc	200	22748.6	5.81
BrWRKY28	BraA02g036060.3C	25075953	25077860	-	A02	I	475	51915.5	7.68
BrWRKY29	BraA02g040310.3C	28021239	28023060	+	A02	IIc	347	38388	6.86
BrWRKY30	BraA02g040420.3C	28089700	28090854	+	A02	IId	337	37292.4	9.78
BrWRKY31	BraA02g041180.3C	28579445	28580456	-	A02	IIc	168	18850.9	6.52
BrWRKY32	BraA02g044790.3C	30810754	30811927	+	A02	IIc	197	22203.5	7
BrWRKY33	BraA03g005540.3C	2404017	2405054	-	A03	IIc	147	17086	9.3
BrWRKY34	BraA03g006670.3C	2888845	2891051	+	A03	IIb	527	56744.7	6.05
BrWRKY35	BraA03g013050.3C	5670823	5672331	-	A03	I	449	49038.2	6.04
BrWRKY36	BraA03g013350.3C	5811911	5816725	-	A03	I	868	98194.1	9.04
BrWRKY37	BraA03g016110.3C	7426532	7428114	-	A03	I	378	42550.1	6.19
BrWRKY38	BraA03g016330.3C	7547435	7548634	+	A03	IId	332	37287.2	9.88
BrWRKY39	BraA03g019460.3C	9202790	9204314	+	A03	I	422	46294.4	9.48
BrWRKY40	BraA03g020140.3C	9612695	9614600	+	A03	I	473	52199.6	8.37
BrWRKY41	BraA03g021610.3C	10328793	10330356	-	A03	III	340	38310.9	5.25
BrWRKY42	BraA03g023460.3C	11247959	11249634	-	A03	IIc	210	24158.7	9.04
BrWRKY43	BraA03g024160.3C	11893145	11894176	-	A03	III	283	32195.1	5.76
BrWRKY44	BraA03g028140.3C	14060778	14063245	+	A03	IIb	519	57154.5	6.49
BrWRKY45	BraA03g030680.3C	15373621	15375790	-	A03	I	458	49797	8.88
BrWRKY46	BraA03g031780.3C	15792334	15793434	-	A03	IId	319	35240.9	9.44
BrWRKY47	BraA03g041890.3C	21023481	21025313	+	A03	I	447	49213	8.07
BrWRKY48	BraA03g048120.3C	24357461	24358583	+	A03	IIc	312	34986.2	6.27
BrWRKY49	BraA03g051140.3C	26327798	26329045	+	A03	IIe	299	33385.2	5.82
BrWRKY50	BraA03g051480.3C	26561793	26562961	-	A03	III	323	36019.3	5.67
BrWRKY51	BraA03g051740.3C	26733160	26734983	+	A03	IId	348	38020.1	9.81
BrWRKY52	BraA03g053130.3C	27530305	27532148	-	A03	I	529	58398.9	5.82
BrWRKY53	BraA03g053220.3C	27573309	27580361	-	A03	I	706	78038.7	6.4
BrWRKY54	BraA03g056240.3C	29469424	29471749	-	A03	I	389	43131.4	8.57
BrWRKY55	BraA03g056710.3C	29774238	29775619	-	A03	IId	328	36094.8	9.54
BrWRKY56	BraA03g056960.3C	29894685	29895836	+	A03	IIa	285	31720.2	6.76
BrWRKY57	BraA03g063940.3C	36469213	36471697	+	A03	IIb	527	57660	5.9
BrWRKY58	BraA04g001080.3C	701135	702153	+	A04	III	276	31637.6	5.57
BrWRKY59	BraA04g002600.3C	1594026	1595579	-	A04	IIe	278	30803.6	4.95
BrWRKY60	BraA04g004020.3C	2480661	2481981	+	A04	III	285	32184	6.05
BrWRKY61	BraA04g004030.3C	2485562	2486246	-	A04	III	130	14811.4	7
BrWRKY62	BraA04g014060.3C	10963146	10963926	+	A04	IIc	117	13583.1	7.06
BrWRKY63	BraA04g015990.3C	12150746	12152628	-	A04	IIc	196	22638.4	6.44
BrWRKY64	BraA04g017140.3C	13079510	13080646	+	A04	IId	319	34647.1	9.75
BrWRKY65	BraA04g018060.3C	13721342	13722757	-	A04	IId	325	35239.1	9.89
BrWRKY66	BraA04g021550.3C	16139418	16140792	-	A04	I	350	39274.6	6.98
BrWRKY67	BraA04g021880.3C	16309576	16310703	+	A04	IId	321	36118.1	9.92
BrWRKY68	BraA04g024840.3C	17958057	17960712	-	A04	IIe	415	45124.8	5.45
BrWRKY69	BraA04g027230.3C	19232588	19234292	+	A04	I	422	46291.3	7.66
BrWRKY70	BraA04g028830.3C	20079795	20081428	+	A04	III	284	31614.3	6.39
BrWRKY71	BraA04g028840.3C	20083312	20084832	-	A04	III	330	36932.8	5.22
BrWRKY72	BraA04g030970.3C	21173539	21175100	+	A04	IIc	217	24605.2	8.58
BrWRKY73	BraA05g000580.3C	325566	327107	+	A05	IIc	319	36027.9	6.23
BrWRKY74	BraA05g001400.3C	869351	870425	+	A05	III	272	30720.4	5.13
BrWRKY75	BraA05g001850.3C	1076740	1078387	-	A05	III	339	37986.9	5.66
BrWRKY76	BraA05g004630.3C	2351327	2352806	-	A05	IIc	215	24428	8.8
BrWRKY77	BraA05g007160.3C	3646370	3649581	-	A05	I	485	53114.9	8.06
BrWRKY78	BraA05g008220.3C	4228296	4229785	-	A05	I	409	44894.7	9.12
BrWRKY79	BraA05g010220.3C	5446822	5449428	+	A05	IIe	390	41950.1	5.36
BrWRKY80	BraA05g013800.3C	7747462	7748630	-	A05	IId	335	37886.9	9.67
BrWRKY81	BraA05g014020.3C	7896725	7898233	+	A05	I	373	42136.7	6.58
BrWRKY82	BraA05g016130.3C	9552019	9553908	+	A05	I	432	48026.4	4.98
BrWRKY83	BraA05g040470.3C	27421962	27423004	+	A05	IId	303	33522	9.45
BrWRKY84	BraA05g040940.3C	27645729	27648084	-	A05	I	430	46893.5	9.48
BrWRKY85	BraA06g000480.3C	327185	329891	+	A06	I	601	67338.9	6.08
BrWRKY86	BraA06g010070.3C	5443999	5446157	+	A06	I	471	51263.6	7.68
BrWRKY87	BraA06g014580.3C	7743768	7747134	+	A06	IIb	376	39772.2	9.08
BrWRKY88	BraA06g028240.3C	19630149	19631364	+	A06	IIc	201	22789.9	5.51
BrWRKY89	BraA06g031500.3C	21708987	21710349	-	A06	III	313	35530.2	6.31
BrWRKY90	BraA06g033170.3C	22702188	22703067	-	A06	IIc	154	16888.4	5.25
BrWRKY91	BraA06g034460.3C	23435200	23436749	-	A06	IId	328	36438.7	9.52
BrWRKY92	BraA06g034700.3C	23567487	23569536	-	A06	IIc	399	44503.9	6.27
BrWRKY93	BraA06g039340.3C	26214539	26216471	+	A06	I	486	53465.2	8.15
BrWRKY94	BraA06g041930.3C	27578940	27581374	+	A06	IIc	323	36613.2	6.9
BrWRKY95	BraA06g044350.3C	28853806	28856314	+	A06	IIc	292	32973.8	9.13
BrWRKY96	BraA07g010430.3C	10321305	10323484	-	A07	IIe	396	43042.6	5.55
BrWRKY97	BraA07g010810.3C	10647517	10648977	-	A07	IIc	277	31526.3	8.54
BrWRKY98	BraA07g022390.3C	18047595	18049126	-	A07	III	283	31972.7	5.78
BrWRKY99	BraA07g026010.3C	19944940	19946478	+	A07	IIa	297	32930	8.9
BrWRKY100	BraA07g030410.3C	22257016	22258873	+	A07	IIc	289	31975	6.12
BrWRKY101	BraA07g033350.3C	23849656	23851131	+	A07	IIb	266	29934.6	9.23
BrWRKY102	BraA07g034200.3C	24353253	24355044	-	A07	IIc	294	32518.7	6.92
BrWRKY103	BraA07g034690.3C	24627987	24630093	-	A07	IIb	383	42619.6	6.35
BrWRKY104	BraA07g042700.3C	28507036	28508574	-	A07	IIa	300	33422.7	8.85
BrWRKY105	BraA08g000490.3C	313969	316543	+	A08	I	447	50575.8	5.07
BrWRKY106	BraA08g000500.3C	326555	327327	+	A08	I	175	19829	6.59
BrWRKY107	BraA08g000570.3C	345506	346366	+	A08	I	219	24869	9.54
BrWRKY108	BraA08g002070.3C	1465763	1467508	+	A08	I	344	37726.3	5.03
BrWRKY109	BraA08g002100.3C	1492467	1494216	+	A08	I	414	45410.9	5.05
BrWRKY110	BraA08g012800.3C	11021695	11022853	+	A08	IIc	294	33269.4	7.68
BrWRKY111	BraA08g015330.3C	12646157	12647679	+	A08	IIe	308	34167.1	8.45
BrWRKY112	BraA08g017290.3C	13993601	13995444	-	A08	IIa	308	34710.7	8.16
BrWRKY113	BraA08g017440.3C	14069796	14071228	+	A08	IId	332	36368.2	9.66
BrWRKY114	BraA08g017840.3C	14291074	14293104	+	A08	I	457	49562.2	6.49
BrWRKY115	BraA08g019780.3C	15262689	15265757	+	A08	I	544	59894.7	6.75
BrWRKY116	BraA08g022420.3C	16828880	16831213	+	A08	IIc	296	33899.4	7.84
BrWRKY117	BraA08g023980.3C	17596129	17597049	-	A08	IIe	261	29254.7	5.41
BrWRKY118	BraA08g028490.3C	19873979	19876593	-	A08	IIb	517	57702.9	5.98
BrWRKY119	BraA08g030380.3C	20617033	20618852	-	A08	I	419	45167	6.61
BrWRKY120	BraA09g000290.3C	118416	119554	-	A09	IIe	298	32343.5	6.66
BrWRKY121	BraA09g002340.3C	1437732	1440833	-	A09	IIb	490	53940.5	552
BrWRKY122	BraA09g004570.3C	2776005	2777775	+	A09	IIc	353	39422.4	6.22
BrWRKY123	BraA09g005690.3C	3320390	3321353	+	A09	IIc	171	19025.8	5.57
BrWRKY124	BraA09g006250.3C	3644761	3646267	+	A09	III	312	35054.8	6.49
BrWRKY125	BraA09g008440.3C	4831353	4832372	+	A09	IIc	168	18916	7.05
BrWRKY126	BraA09g013550.3C	7945037	7945435	+	A09	IIc	132	14684.1	5.43
BrWRKY127	BraA09g014790.3C	8665724	8666769	-	A09	IIc	187	21159.8	6.7
BrWRKY128	BraA09g016030.3C	9756593	9759001	+	A09	IIb	552	60597.1	5.79
BrWRKY129	BraA09g019700.3C	12685920	12687290	-	A09	IIc	342	39111	7.64
BrWRKY130	BraA09g021790.3C	14248741	14252504	-	A09	IIc	321	36531	7.71
BrWRKY131	BraA09g025880.3C	17411363	17414228	-	A09	IIb	516	56871	6.15
BrWRKY132	BraA09g033340.3C	26023182	26024132	-	A09	III	258	29744.8	6.04
BrWRKY133	BraA09g034360.3C	27038916	27041182	-	A09	IIe	407	44282.8	5.7
BrWRKY134	BraA09g035200.3C	27851354	27852439	-	A09	IIc	273	30915.6	7.75
BrWRKY135	BraA09g035620.3C	28164430	28165322	-	A09	IIe	262	29553.8	5.33
BrWRKY136	BraA09g047100.3C	35723907	35725313	-	A09	III	276	31062.8	6.31
BrWRKY137	BraA09g048940.3C	36680313	36681724	+	A09	IIe	271	30122.1	4.99
BrWRKY138	BraA09g051760.3C	37977482	37978573	-	A09	IIc	298	34162.9	7.2
BrWRKY139	BraA09g055240.3C	39885106	39886360	+	A09	IIc	197	22694.3	6.5
BrWRKY140	BraA09g056990.3C	40672643	40675040	-	A09	IIb	519	57423.1	6.01
BrWRKY141	BraA09g059800.3C	42028579	42030555	-	A09	I	480	51906.5	8.18
BrWRKY142	BraA10g014130.3C	11420756	11423021	+	A10	I	673	73009.5	5.92
BrWRKY143	BraA10g018860.3C	13946197	13947327	+	A10	III	288	33024.3	5.59
BrWRKY144	BraA10g024220.3C	16625977	16628404	-	A10	IIb	551	59683.8	6
BrWRKY145	BraA10g025660.3C	17236083	17237083	+	A10	IIc	147	17073.2	9.52
BrWRKY146	BraAnng003190.3C	6276	8025	+	Scaffold0577	I	414	45421	5.05
BrWRKY147	BraAnng003710.3C	68110	69295	+	Scaffold0640	IIc	323	36126	6.42
BrWRKY148	BraAnng005520.3C	70382	70904	-	Scaffold0923	IIc	144	16766.8	9.43
